# Supplementary material for: Metabolite Profiling of Manilkara zapota L. Leaves by High-Resolution Mass Spectrometry Coupled with ESI and APCI and In Vitro Antioxidant Activity, α-Glucosidase, and Elastase Inhibition Assays
Source: MDPI journal article supplement (doi:10.3390/ijms22010132), 2020-12-24
Supplement: s1 [file s1]

# Metabolite Profiling of *Manilkara zapota* L. Leaves by High-Resolution Mass Spectrometry Coupled with ESI and APCI and in Vitro Antioxidant Activity, $\alpha$ -Glucosidase, and Elastase Inhibition Assays

Syful Islam <sup>1,2,†</sup>, Md Badrul Alam <sup>3,4,†</sup>, Hyeon-Jin Ann <sup>3</sup>, Ji-Hyun Park <sup>3</sup>, Sang-Han Lee <sup>3,4,5,\*</sup> and Sunghwan Kim <sup>1,6,\*</sup>

<sup>1</sup> Department of Chemistry, Kyungpook National University, Daegu 41566, Korea; msi412@yahoo.com

<sup>2</sup> Department of Environment, Munshiganj District Office, Munshiganj-1500, Bangladesh

<sup>3</sup> Department of Food Science and Biotechnology, Kyungpook National University, Daegu 41566, Korea; mbalam@knu.ac.kr (M.B.A.); jiny345@knu.ac.kr (H.-J.A.); wlgus6744@knu.ac.kr (J.-H.P.)

<sup>4</sup> Food and Bio-Industry Research Institute, Inner Beauty/Antiaging Center, Kyungpook National University, Daegu 41566, Korea

<sup>5</sup> knu BnC, Daegu 41566, Korea

<sup>6</sup> Mass Spectrometry Converging Research Center and Green-Nano Materials Research Center, Kyungpook National University, Daegu 41566, Korea

\* Correspondence: sang@knu.ac.kr (S.-H.L.); sunghwank@knu.ac.kr (S.K.)

† These authors have equal contribution

**Supplementary materials:**

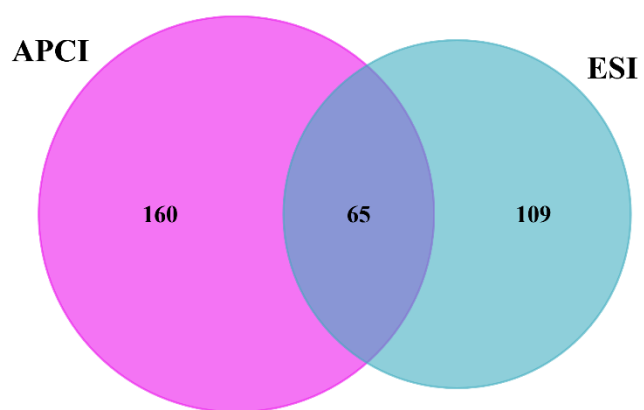

**Figure S1:** Venn diagram showing the overlapping peaks detected in (–) mode electrospray ionization (ESI) and atmospheric pressure chemical ionization (APCI) mass spectrometry (MS).

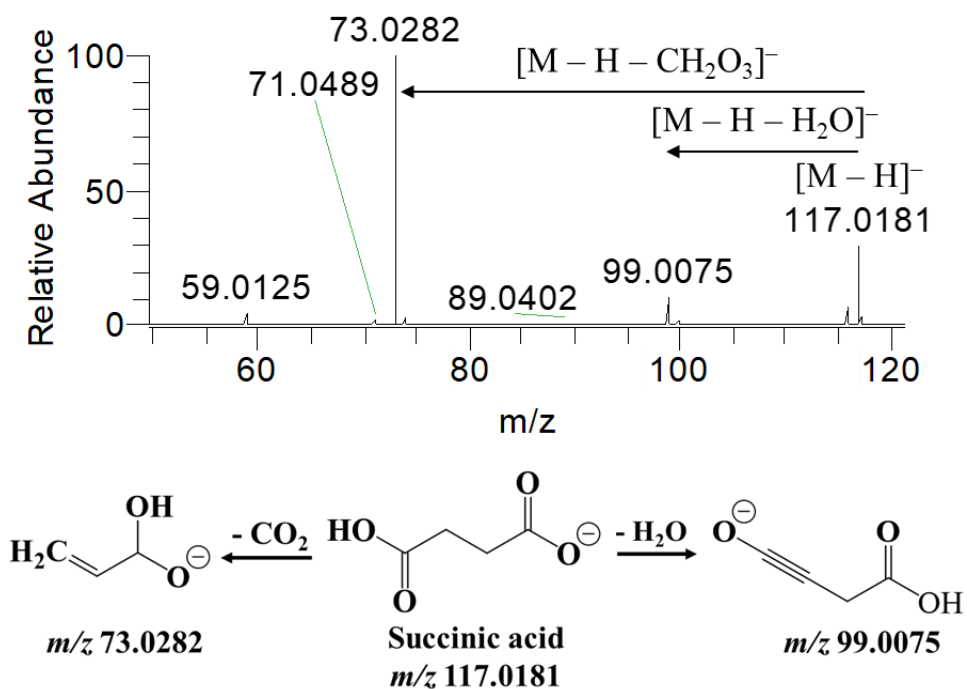

**Figure S2:** (-) mode electrospray ionization tandem mass spectrometry (ESI MS/MS) fragmentation pattern of succinic acid.

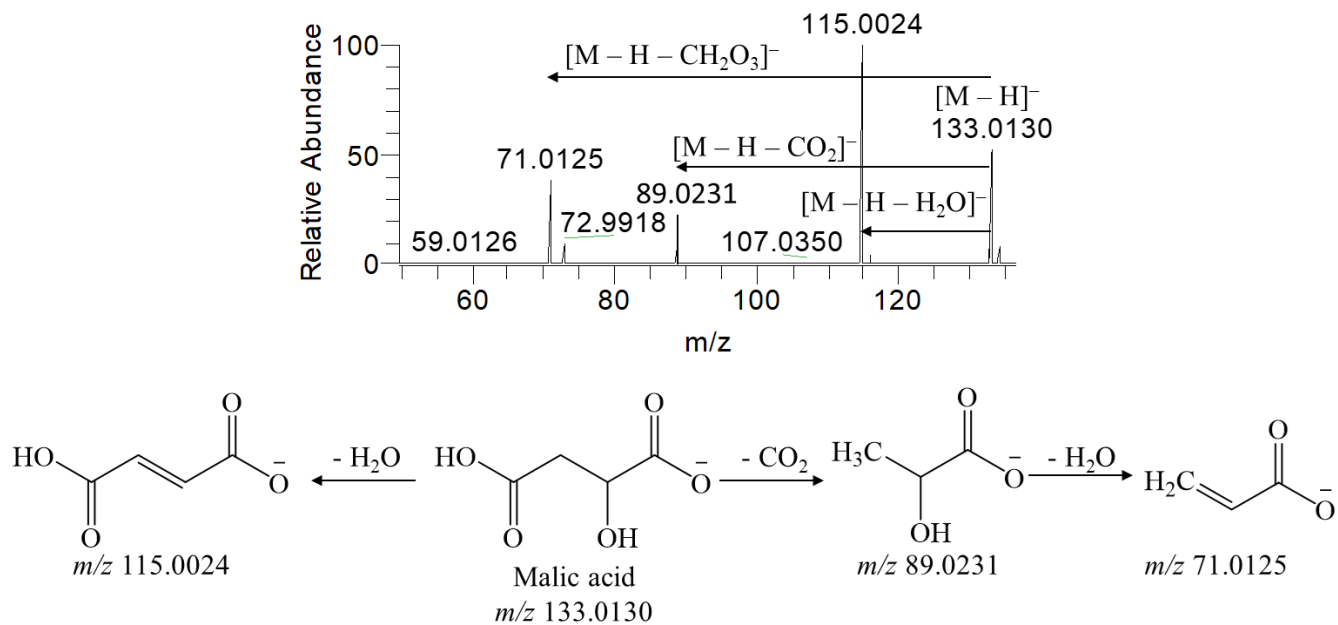

**Figure S3:** (-) mode electrospray ionization tandem mass spectrometry (ESI MS/MS) fragmentation pattern of malic acid.

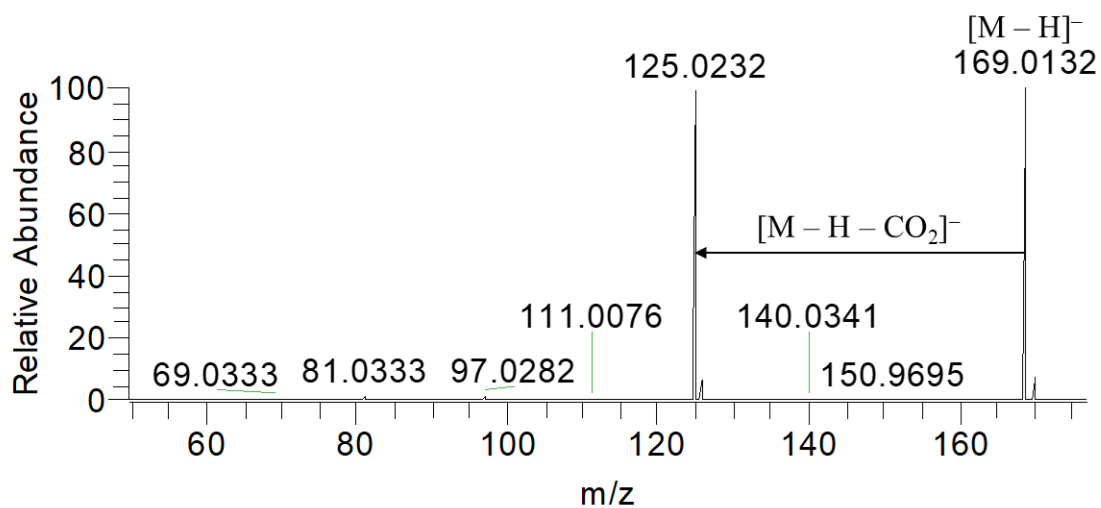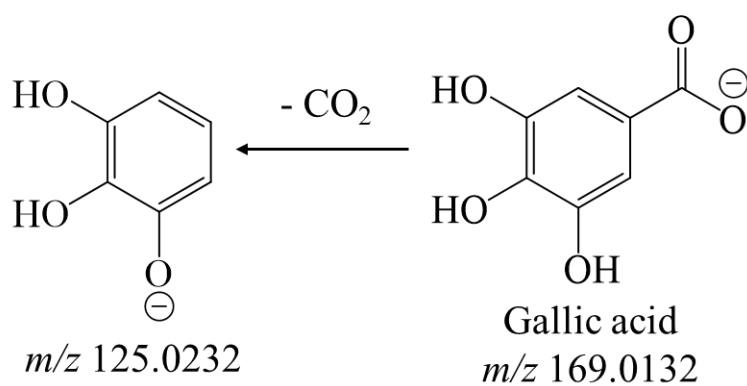

**Figure S4:** (–) mode electrospray ionization tandem mass spectrometry (ESI MS/MS) fragmentation pattern of gallic acid.

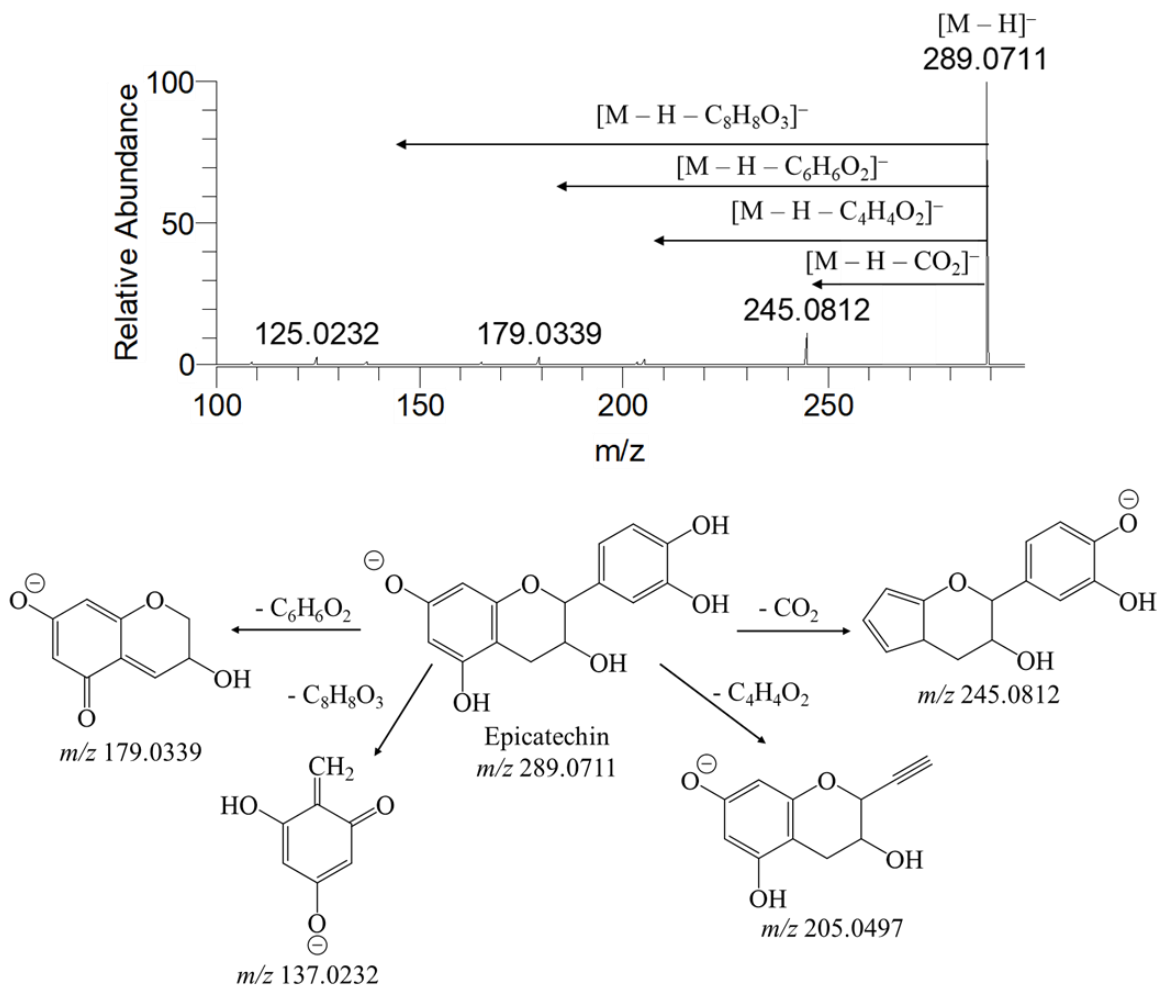

**Figure S5:** (–) mode electrospray ionization tandem mass spectrometry (ESI MS/MS) fragmentations of epicatechin.

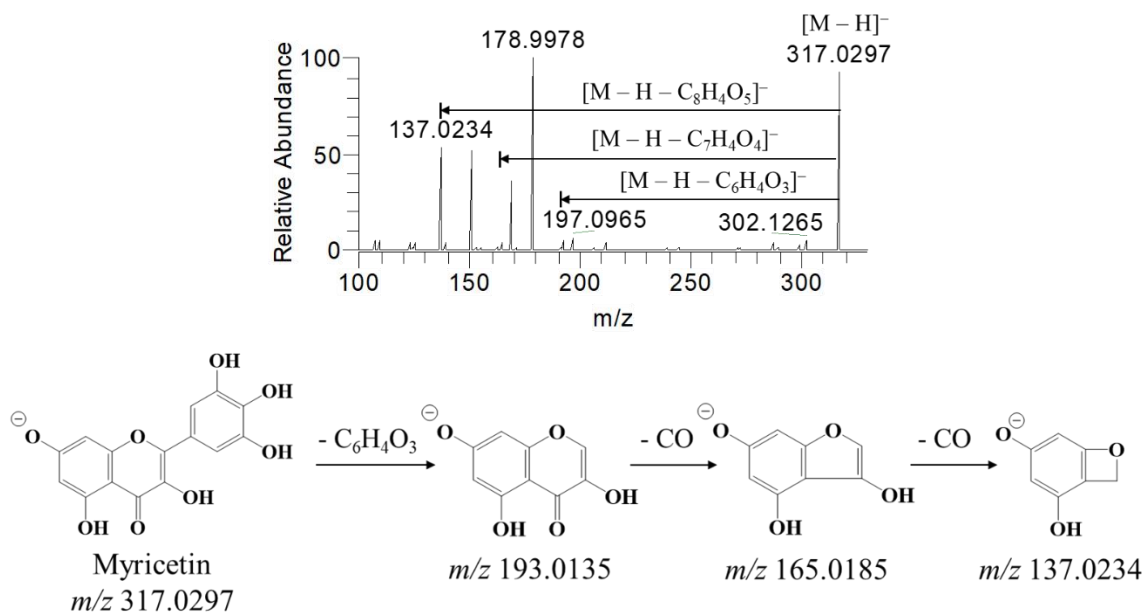

**Figure S6:** (–) mode atmospheric pressure chemical ionization tandem mass spectrometry (APCI MS/MS) fragments of myricetin.

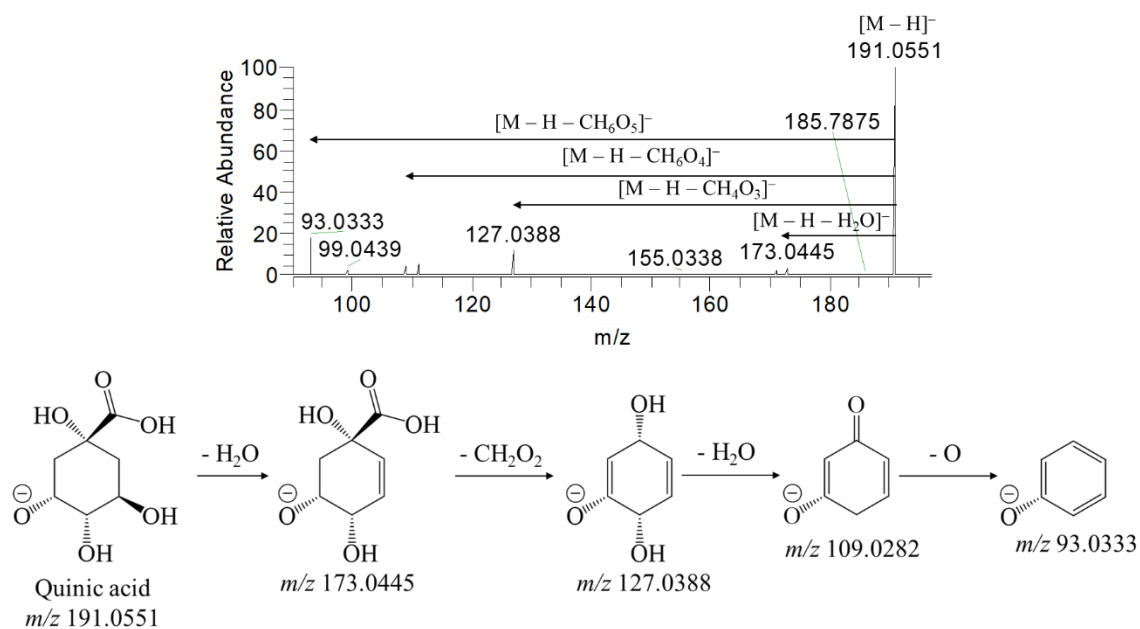

**Figure S7:** (–) mode electrospray ionization tandem mass spectrometry (ESI MS/MS) fragments of quinic acid.

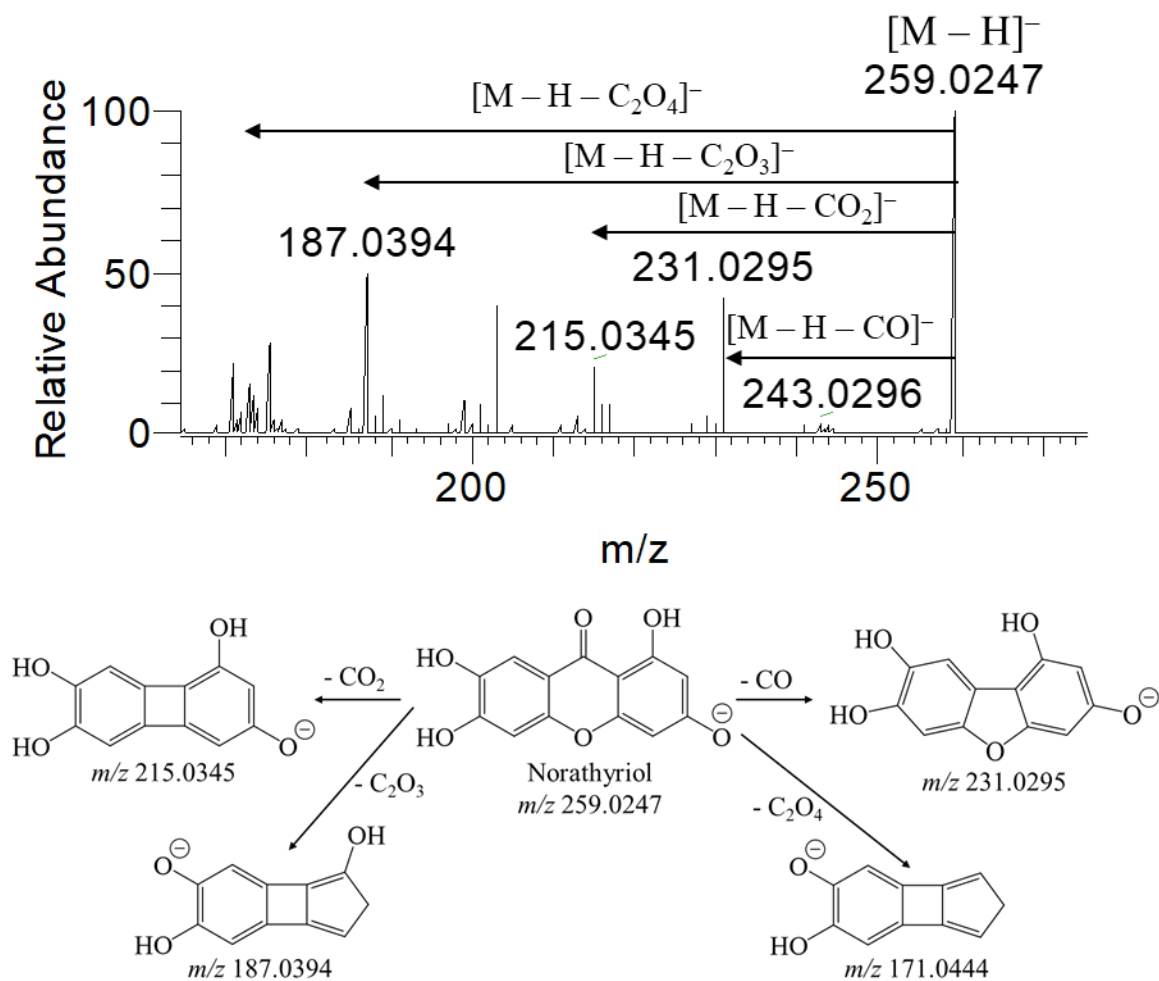

**Figure S8:** (-) mode atmospheric pressure chemical ionization tandem mass spectrometry (APCI MS/MS) fragments of norathyriol.

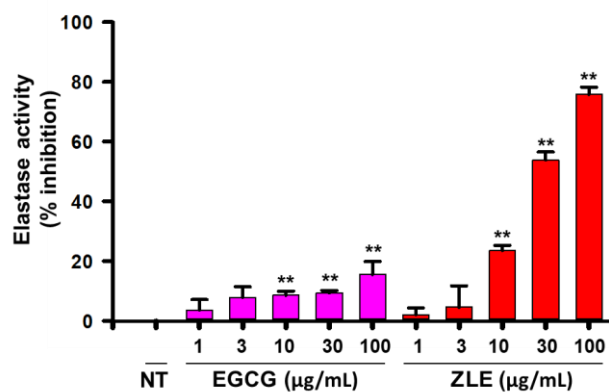

**Figure S9:** Elastase-inhibition activities of *Manilkara zapota* leaves ethanol extracts (ZLE).

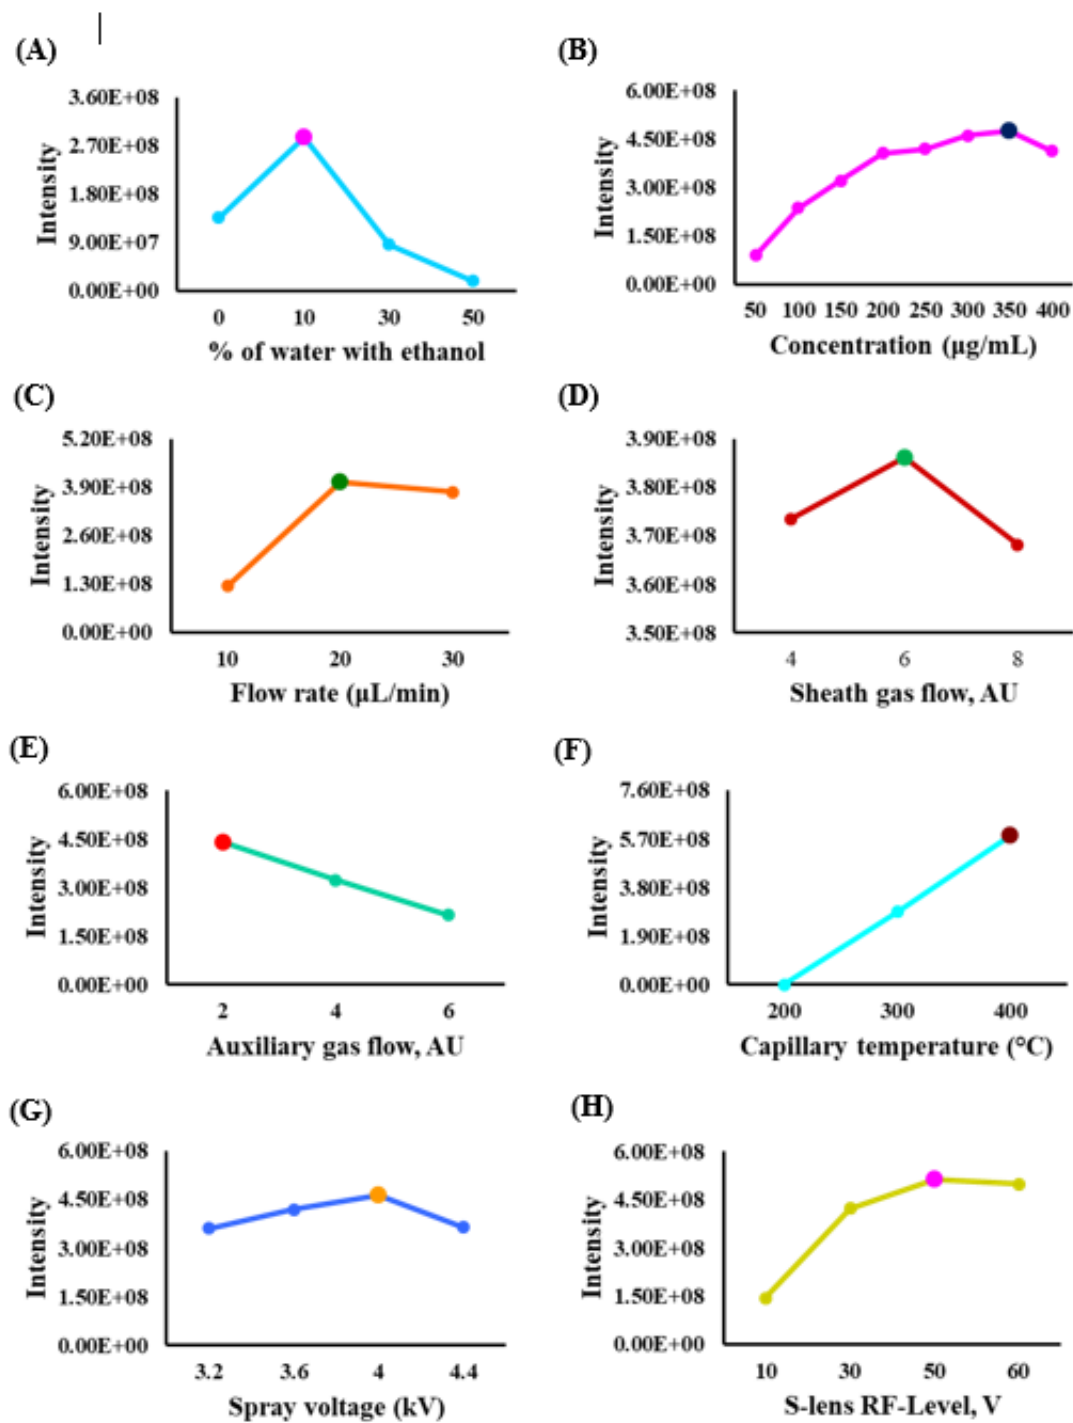

**Figure S10:** Optimization of negative-mode electrospray ionization mass spectrometry (ESI-MS) operating parameters.



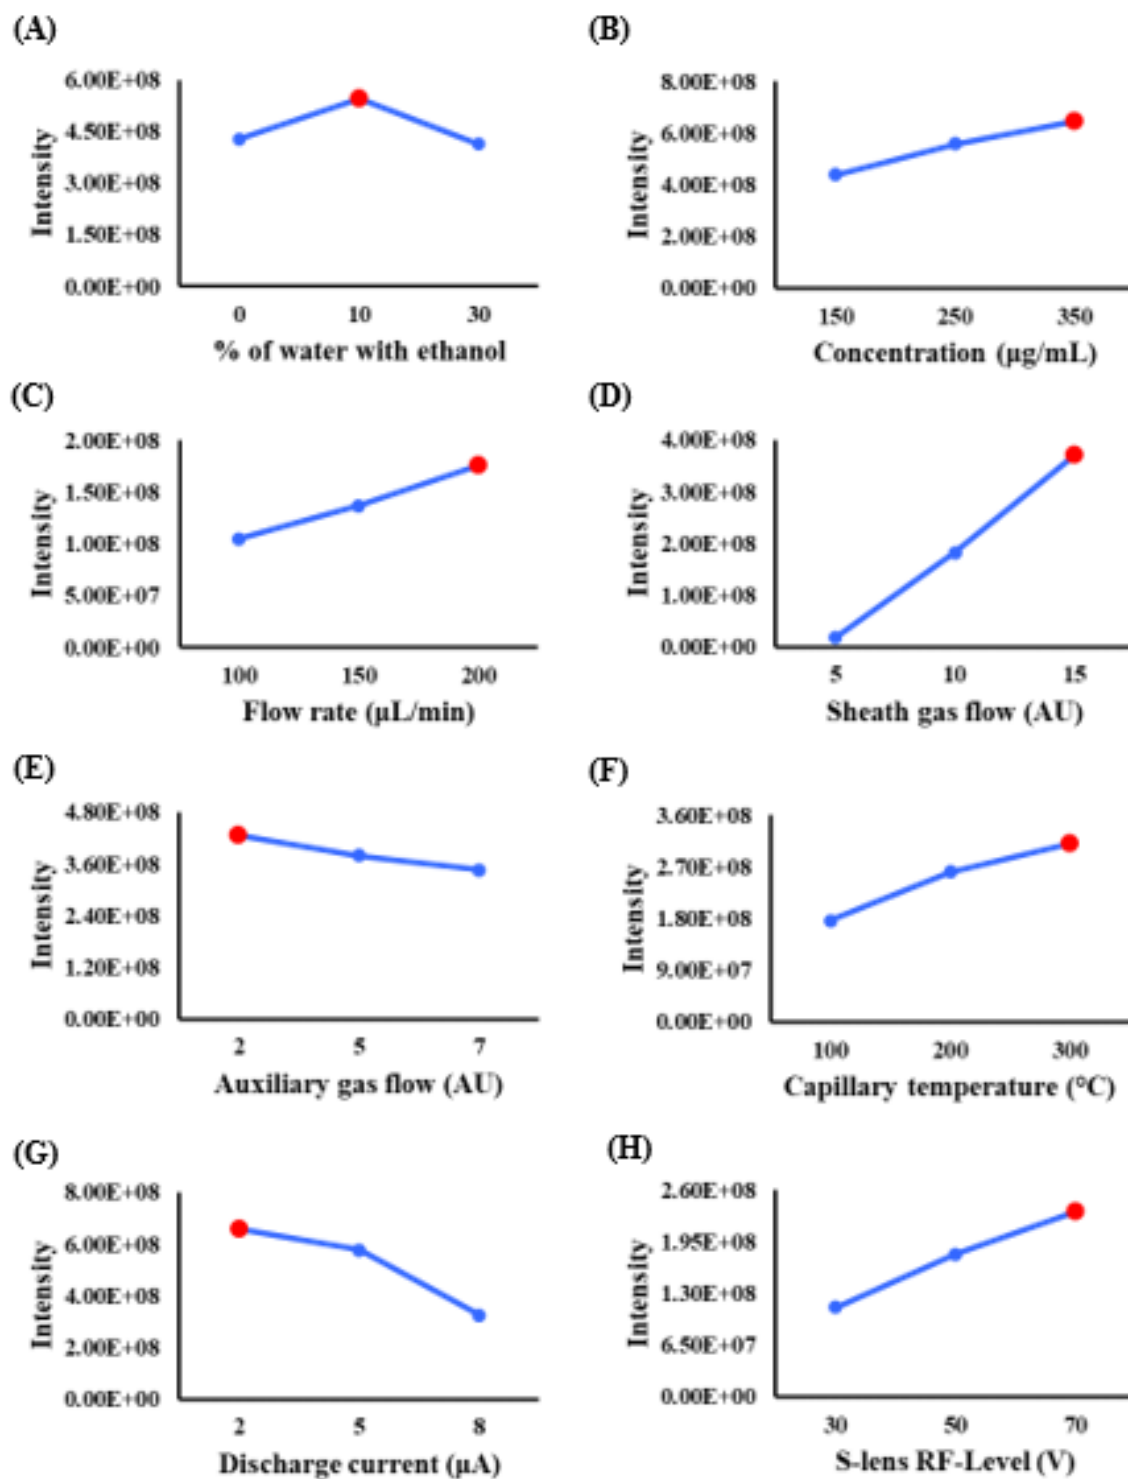

**Figure S11:** Optimization of (-) mode atmospheric pressure chemical ionization mass spectrometry (APCI-MS) operating parameters.

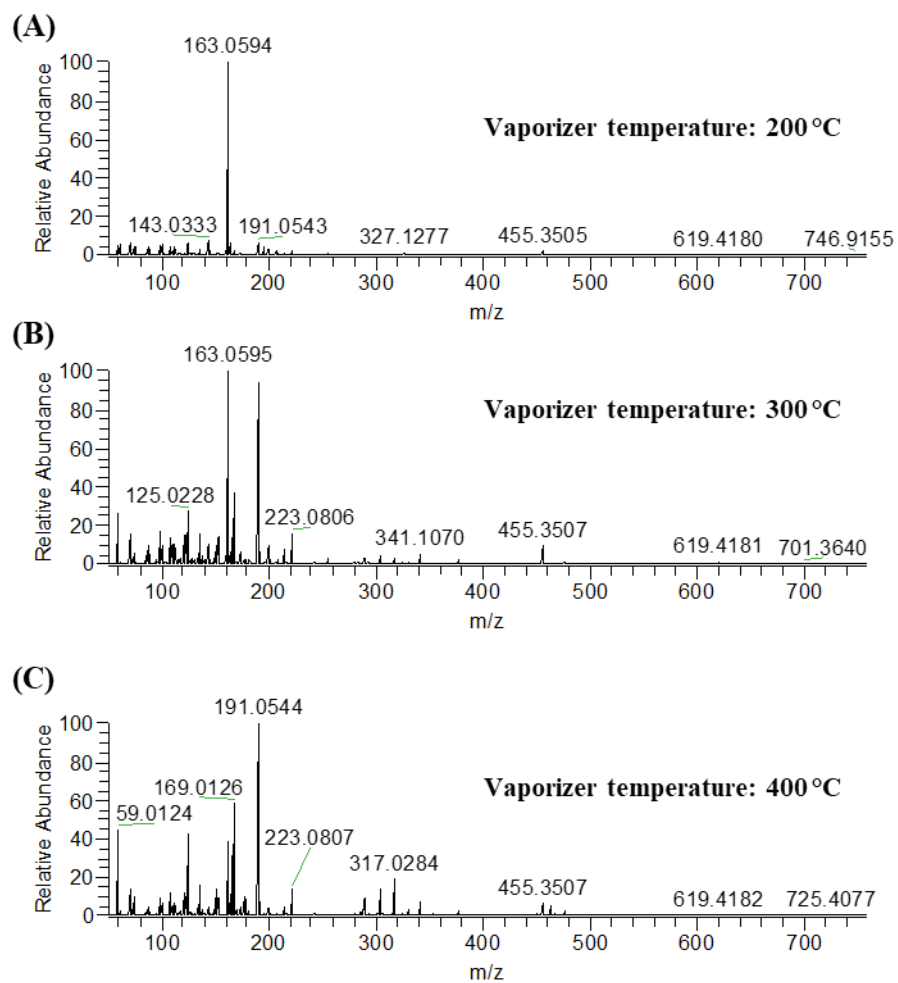

**Figure S12:** (–) mode atmospheric pressure chemical ionization (APCI) mass spectra at different vaporizer temperatures.

**Table S2.** Optimized operational conditions for negative-mode electrospray ionization mass spectrometry (ESI–MS).

| <b>parameters</b>                      | <b>values considered for optimization</b> | <b>optimized value</b> |
|----------------------------------------|-------------------------------------------|------------------------|
| composition of % of water with ethanol | 0, 10, 30, 50                             | 10                     |
| concentration, µg/mL                   | 50, 100, 150, 200, 250, 300, 350, 400     | 350                    |
| flow rate, µL/min                      | 10, 20, 30                                | 20                     |
| sheath gas flow, AU                    | 4, 6, 8                                   | 6                      |
| auxiliary gas flow, AU                 | 2, 4, 6                                   | 2                      |
| capillary temperature, °C              | 200, 300, 400                             | 400                    |
| spray voltage, kV                      | 3.2, 3.6, 4, 4.4                          | 4                      |
| S-lens RF level, V                     | 10, 30, 50, 60                            | 50                     |

**Table S3.** Optimized operational conditions for (–) mode atmospheric pressure chemical ionization mass spectrometry (APCI-MS).

| <b>Parameters</b>                      | <b>Values considered for optimization</b> | <b>Optimized value</b> |
|----------------------------------------|-------------------------------------------|------------------------|
| Composition of % of water with ethanol | 0, 10, 30                                 | 10                     |
| Concentration, µg/mL                   | 150, 250, 350                             | 350                    |
| Flow rate, µL/min                      | 100, 150, 200                             | 200                    |
| Sheath gas flow, AU                    | 5, 10, 15                                 | 15                     |
| Auxiliary gas flow, AU                 | 2, 5, 7                                   | 2                      |
| Capillary temperature, °C              | 100, 200, 300                             | 300                    |
| Vaporizer temperature, °C              | 200, 300, 400                             | 400                    |
| Discharge current, µA                  | 2, 5, 8                                   | 2                      |
| S-lens RF-level, V                     | 30, 50, 70                                | 70                     |
